# Supplementary material for: Cohort profile: Study on Zika virus infection in Brazil (ZIKABRA study)
Source: PubMed Central journal article supplement (PMC7785242; doi:10.1371/journal.pone.0244981), 2021-01-05
Supplement: pone.0244981.s001.pdf [file pone.0244981.s001.pdf]

**PRE**

Número de triagem:

\_\_\_\_\_

Repetir Número de triagem:

Repeat Screening number:

\_\_\_\_\_

"Número de Triagem" e "Repetir Número de Triagem" estão diferentes, por favor verificar!

"Screening number" and "Repeat screening number" are different, please verify!

Se Centro = 51 (Manaus - FMT - Outpatient ou Manaus - FMT - Study clinic), então o NÚMERO DE TRIAGEM deve ser entre 40001 - 40999 ou 42001 - 42999!

If Centre = 51 (Manaus - FMT - Outpatient or Manaus - FMT - Study clinic), then SCREENING NUMBER should be between 40001 - 40999 or 42001 - 42999!

Se Centro = 81 (Rio de Janeiro - FIOCRUZ), então o NÚMERO DE TRIAGEM deve ser entre 60001 - 60999!

If Centre = 81 (Rio de Janeiro - FIOCRUZ) then SCREENING NUMBER should be between 60001 - 60999!

Se Centro = 91 (Recife-HC), então o NÚMERO DE TRIAGEM deve ser entre 30001 - 30999 ou 32001 - 32999 ou 34001 - 34999!

If Centre = 91 (Recife-HC), then SCREENING NUMBER should be between 30001 - 30999 or 32001 - 32999 or 34001 - 34999!

Se Centro = 92 (Recife-UPA-Caxangá-Clinic or Recife-UPA-Caxangá-Home), então o NÚMERO DE TRIAGEM deve ser entre 30001 - 30999 ou 32001 - 32999 ou 34001 - 34999!

If Centre = 92 (Recife-UPA-Caxangá-Clinic or Recife-UPA-Caxangá-Home), then SCREENING NUMBER should be between 30001 - 30999 or 32001 - 32999 or 34001 - 34999!

### **A65921 - Persistência do vírus Zika nos fluidos corporais de pacientes com infecção pelo vírus Zika**

#### **Questionário de Pré-triagem**

### **A65921 - Persistence of Zika virus in body fluids of patients with Zika virus infection Pre-screening Questionnaire**

Centro:

Centre:

- 51 = Manaus-FMT  
 81 = Rio de Janeiro-FIOCRUZ  
 91 = Recife-HC  
 92 = Recife-UPA-Caxangá

**INFORMAÇÕES PRE-TRIAGEM**

1. a) Data da pre-triagem:  
1. a) Date of pre-screening: \_\_\_\_\_

b) Profissional de saúde que realizou a pré-triagem  
(iniciais):  
b) Pre-screened by (study staff initials):

- LHM = Luiz Maciel  
 FAF = Francielen de Azevedo Furtado  
 PCT = Pâmela  
 NMR = Nágila Morais Rocha  
 CAB = Camila Botto

b) Profissional de saúde que realizou a pré-triagem  
(iniciais):  
b) Pre-screened by (study staff initials):

- FFS = Fernanda Figueiredo  
 KEV = Kenya Valenca

c) Qual e a origem do encaminhamento desta pessoa?  
c) What is the source of of referral for this person?

- 1 = Recife - Contatante (Recife - Contact)  
 2 = Recife - Posto de Saúde (Recife - Health center)  
 3 = Recife - Serviço privado (Recife - Private hospital)  
 99 = Outro (Other)

Se Outro, especificar:  
If Other, specify: \_\_\_\_\_

2. a) A pessoa é um potencial índice ou um  
contactante?  
2. a) Is this person a potential index case or a  
contact case?

- 1 = Potencial índice (Potential index)  
 2 = Contactante (Contact)

b) Se contactante, número do caso índice:  
b) If contact, report study ID for index case: \_\_\_\_\_

Se Centro = 51 (Manaus - FMT), então "número do caso índice" deve ser entre 151001 - 151300 ou 251001 - 251300!

If Centre = 51 (Manaus - FMT), then "study ID for index case" should be between 151001 - 151300 or 251001 - 251300!

Se Centro = 81 (Rio de Janeiro - FIOCRUZ), então "número do caso índice" deve ser entre 181001 - 181300 ou 281001 - 281300!

If Centre = 81 (Rio de Janeiro - FIOCRUZ), then "study ID for index case" should be between 181001 - 181300 or 281001 - 281300!

Se Centro = 91 (Recife - HC), então "número do caso índice" deve ser entre 191001 - 191300 ou 291001 - 291300!

If Centre = 91 (Recife - HC), then "study ID for index case" should be between 191001 - 191300 or 291001 - 291300!

Se Centro = 92 (Recife-UPA-Caxangá-Clinic or Recife-UPA-Caxangá-Home), então "número do caso índice" deve ser entre 191001 - 191300 ou 291001 - 291300!

If Centre = 92 (Recife-UPA-Caxangá-Clinic or Recife-UPA-Caxangá-Home), then "study ID for index case" should be between 191001 - 191300 or 291001 - 291300!

c) Se contato, qual o relacionamento com o caso índice?

c) If contact, relationship with index case?

- 1 = Marido/companheiro (Husband)  
 2 = Esposa/companheira (Wife)  
 3 = Parceria sexual (outro) (Sexual partner (other))  
 4 = Pai (Father)  
 5 = Mãe (Mother)  
 6 = Irmão (Brother)  
 7 = Irmã (Sister)  
 8 = Filho (Son)  
 9 = Filha (Daughter)  
 10 = Avô (Grand father)  
 11 = Avó (Grand mother)  
 12 = Outro (Other)

Se Outro, especificar:

If Other, specify:

\_\_\_\_\_

3. a) Esta pessoa já participou de prévia triagem para este estudo?

3. a) Has this person already been screened for this study in the past?

- 0 = Não (No)  
 1 = Sim (Yes)

b) Se Sim, preencha o número de triagem inicial:

b) If Yes, report initial screening number:

\_\_\_\_\_

Se Centro = 51 (Manaus - FMT - Outpatient ou Manaus - FMT -

Study clinic), então o NÚMERO DE TRIAGEM deve ser entre 40001 - 40999 ou 42001 - 42999!

If Centre = 51 (Manaus - FMT - Outpatient or Manaus - FMT - Study clinic), then SCREENING NUMBER should be between 40001 - 40999 or 42001 - 42999!

Se Centro = 81 (Rio de Janeiro - FIOCRUZ), então o NÚMERO DE TRIAGEM deve ser entre 60001 - 60999!

If Centre = 81 (Rio de Janeiro - FIOCRUZ) then SCREENING NUMBER should be between 60001 - 60999!

Se Centro = 91 (Recife-HC), então o NÚMERO DE TRIAGEM deve ser entre 30001 - 30999 ou 32001 - 32999 ou 34001 - 34999!

If Centre = 91 (Recife-HC), then SCREENING NUMBER should be between 30001 - 30999 or 32001 - 32999 or 34001 - 34999!

Se Centro = 92 (Recife-UPA-Caxangá-Clinic or Recife-UPA-Caxangá-Home), então o NÚMERO DE TRIAGEM deve ser entre 30001 - 30999 ou 32001 - 32999 ou 34001 - 34999!

If Centre = 92 (Recife-UPA-Caxangá-Clinic or Recife-UPA-Caxangá-Home), then SCREENING NUMBER should be between 30001 - 30999 or 32001 - 32999 or 34001 - 34999!

4. Gênero do participante (autoreferido)?

4. What is the person gender (Self-referenced)?

- 1 = Masculino (Male)  
 2 = Feminino (Female)  
 3 = Outro (Other)

Se Outro, especificar:

If Other, specify:

\_\_\_\_\_

5. a) Qual é a idade da pessoa hoje?

5. a) What is the person's age today?

\_\_\_\_\_

(Anos)

b) Qual é a data de nascimento da pessoa?  
b) What is the person's date of birth?

\_\_\_\_\_

Calculo idade

\_\_\_\_\_

Participante menor de 18 anos, NÃO elegível para o estudo!

Participant under 18, NOT eligible for the study!

Idades diferentes! Por favor verificar.

Different ages! Please verify.

### **ELIGIBILIDADE PARA O PROCESSO DE CONSENTIMENTO DE TRIAGEM** **ELIGIBILITY FOR SCREENING CONSENT PROCESS**

Selecione a opção apropriada  
Select the appropriate option

Se 5.a) Idade  $\geq$  18, então 6.b) deveria ser "Sim"

If 5.a) Age  $\geq$  18, then 6.b) should be "Yes"

Se 5.a) Idade  $<$  18, então 6.b) deveria ser "Não"

If 5.a) Age  $<$  18, then 6.b) should be "No"

|                                                                                                                                                                                                                                                                                        | Não (No)              | Sim (Yes)             |
|----------------------------------------------------------------------------------------------------------------------------------------------------------------------------------------------------------------------------------------------------------------------------------------|-----------------------|-----------------------|
| 6. a) Se a pessoa é um potencial índice, a pessoa tem rash?<br>6. a) If the person is a potential index, does the person present a rash?                                                                                                                                               | <input type="radio"/> | <input type="radio"/> |
| 6. b) A pessoa tem idade igual ou superior a 18 anos?<br>b) Is the person aged 18 or above?                                                                                                                                                                                            | <input type="radio"/> | <input type="radio"/> |
| 6. c) A pessoa vive numa area que permita que ela frequente as visitas do estudo e planeja permanecer nesta residencia durante os próximos 12 meses?<br>c) Does the person live in an area that allows for frequent study visits and plan to stay in this area for the next 12 months? | <input type="radio"/> | <input type="radio"/> |

6. d) A pessoa é capaz de fornecer o consentimento?

d) Is the person able to provide consent?

6. e) Se gênero feminino, a pessoa está grávida?

e) If the person is a woman, is this person pregnant?

Participante não elegível para o estudo!

Participant not eligible for study!

7. A pessoa é elegível para o processo de consentimento?  0 = Não (No)

7. Is the person eligible for the consent process?  1 = Sim (Yes)

Participante não elegível para o estudo! 7. Deveria ser "Não"

Participant not eligible for study! 7. Should be "No"

### CONSENTIMENTO (TRIAGEM)

#### CONSENT (SCREENING)

8. A pessoa assinou o consentimento para a triagem?  0 = Não (No)

8. Has the person signed the consent for screening?  1 = Sim (Yes)

### GÊNERO E TESTE DE GRAVIDEZ

#### GENDER AND PREGNANCY TEST

9. a) Qual é o gênero atribuído à pessoa no nascimento?  1 = Masculino biológico (Biological male)

9. a) What is the person assigned gender at birth?  2 = Feminino biológico (Biological female)

b) 1. Se biológico feminino no nascimento, ela é permanentemente incapaz de engravidar?  0 = Não (No)

b) 1. If the person is biological female at birth, is she permanently unable to have children?  1 = Sim (Yes)

2. Se Sim, qual é a razão?  1 = Menopausa (Menopause)

2. If Yes, what is the reason?  2 = Histerectomia (Hysterectomy)

3 = Ligadura tubária (Tubal ligation)

4 = Ovariectomia bilateral (Bilateral ovariectomy)

5 = Outro (Other)

Se Outro, especificar:  
If Other, specify:

\_\_\_\_\_

c) Se biológico feminino no nascimento e capaz de engravidar, resultado do teste de gravidez?  0 = Negativo (Negative)

c) If biological female at birth and able to have children, pregnancy test result?  1 = Positivo (Positive)

2 = Recusou (Refused)

---

10. Se biológico feminino no nascimento e capaz de engravidar, teste de gravidez é positivo?  
10. If biological female at birth and able to have children, is the pregnancy test positive?

- 0 = Não (No)  
 1 = Sim (Yes)

---

11. a) Se biológico feminino no nascimento, a pessoa está amamentando?  
11. a) If biological female at birth, is the person lactating?

- 0 = Não (No)  
 1 = Sim (Yes)

---

b) Se Sim, qual é a data de nascimento da criança?  
b) If Yes, what is the child's date of birth?

\_\_\_\_\_

---

### **ELIGIBILIDADE PARA TESTE DE AMOSTRAS**

### **ELIGIBILITY FOR SPECIMENS TESTING**

---

12. A pessoa é elegível para triagem da presença do vírus Zika no sangue e na urina (PCR)?  
12. Is the person eligible for blood and urine Zika virus PCR screening?

- 0 = Não (No)  
 1 = Sim (Yes)

---

Observações:  
Remarks:
